# Supplementary material for: ‘Mental heAlth and well-being in rUgby pLayers’ (MAUL) study: an online survey of diverse cohorts of rugby union players internationally
Source: PubMed Central journal article supplement (PMC11629002; doi:10.1136/bmjsem-2024-002164), 2024-12-07
Supplement: bmjsem-10-4-s001.pdf [file bmjsem-10-4-s001.pdf]

**Appendix 1. MAUL Sampling Matrix.**

|           |                                  | Contact |        | Non-Contact |        | Wheelchair |        |  |
|-----------|----------------------------------|---------|--------|-------------|--------|------------|--------|--|
|           |                                  | Male    | Female | Male        | Female | Male       | Female |  |
| Setting   | High-Income Country (HIC)        |         |        |             |        |            |        |  |
|           |                                  |         |        |             |        |            |        |  |
|           |                                  |         |        |             |        |            |        |  |
|           | Low-Middle Income Country (LMIC) |         |        |             |        |            |        |  |
|           |                                  |         |        |             |        |            |        |  |
|           |                                  |         |        |             |        |            |        |  |
| Level     | Elite                            |         |        |             |        |            |        |  |
|           |                                  |         |        |             |        |            |        |  |
|           |                                  |         |        |             |        |            |        |  |
|           | Recreational                     |         |        |             |        |            |        |  |
|           |                                  |         |        |             |        |            |        |  |
|           |                                  |         |        |             |        |            |        |  |
| Geography | Urban                            |         |        |             |        |            |        |  |
|           |                                  |         |        |             |        |            |        |  |
|           |                                  |         |        |             |        |            |        |  |
|           | Rural                            |         |        |             |        |            |        |  |
|           |                                  |         |        |             |        |            |        |  |
|           |                                  |         |        |             |        |            |        |  |
